# Supplementary material for: Globally Abundant “Candidatus Udaeobacter” Benefits from Release of Antibiotics in Soil and Potentially Performs Trace Gas Scavenging
Source: PubMed Central journal article supplement (PMC7343977; doi:10.1128/msphere.00186-20), 2020-07-08

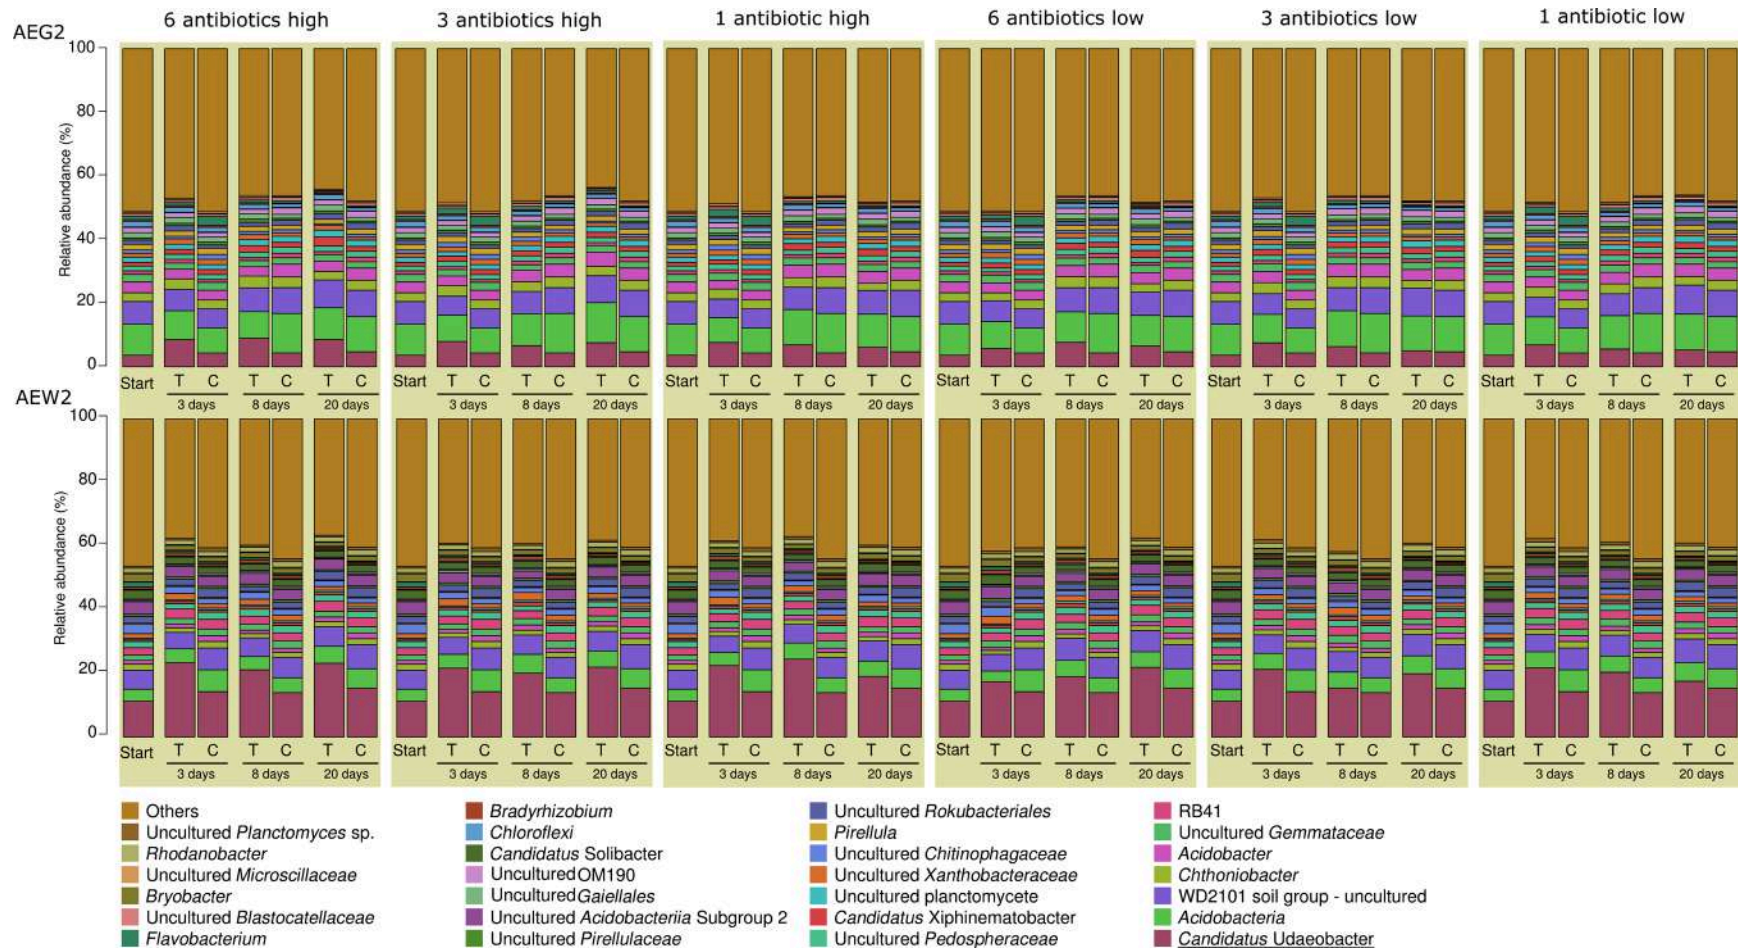

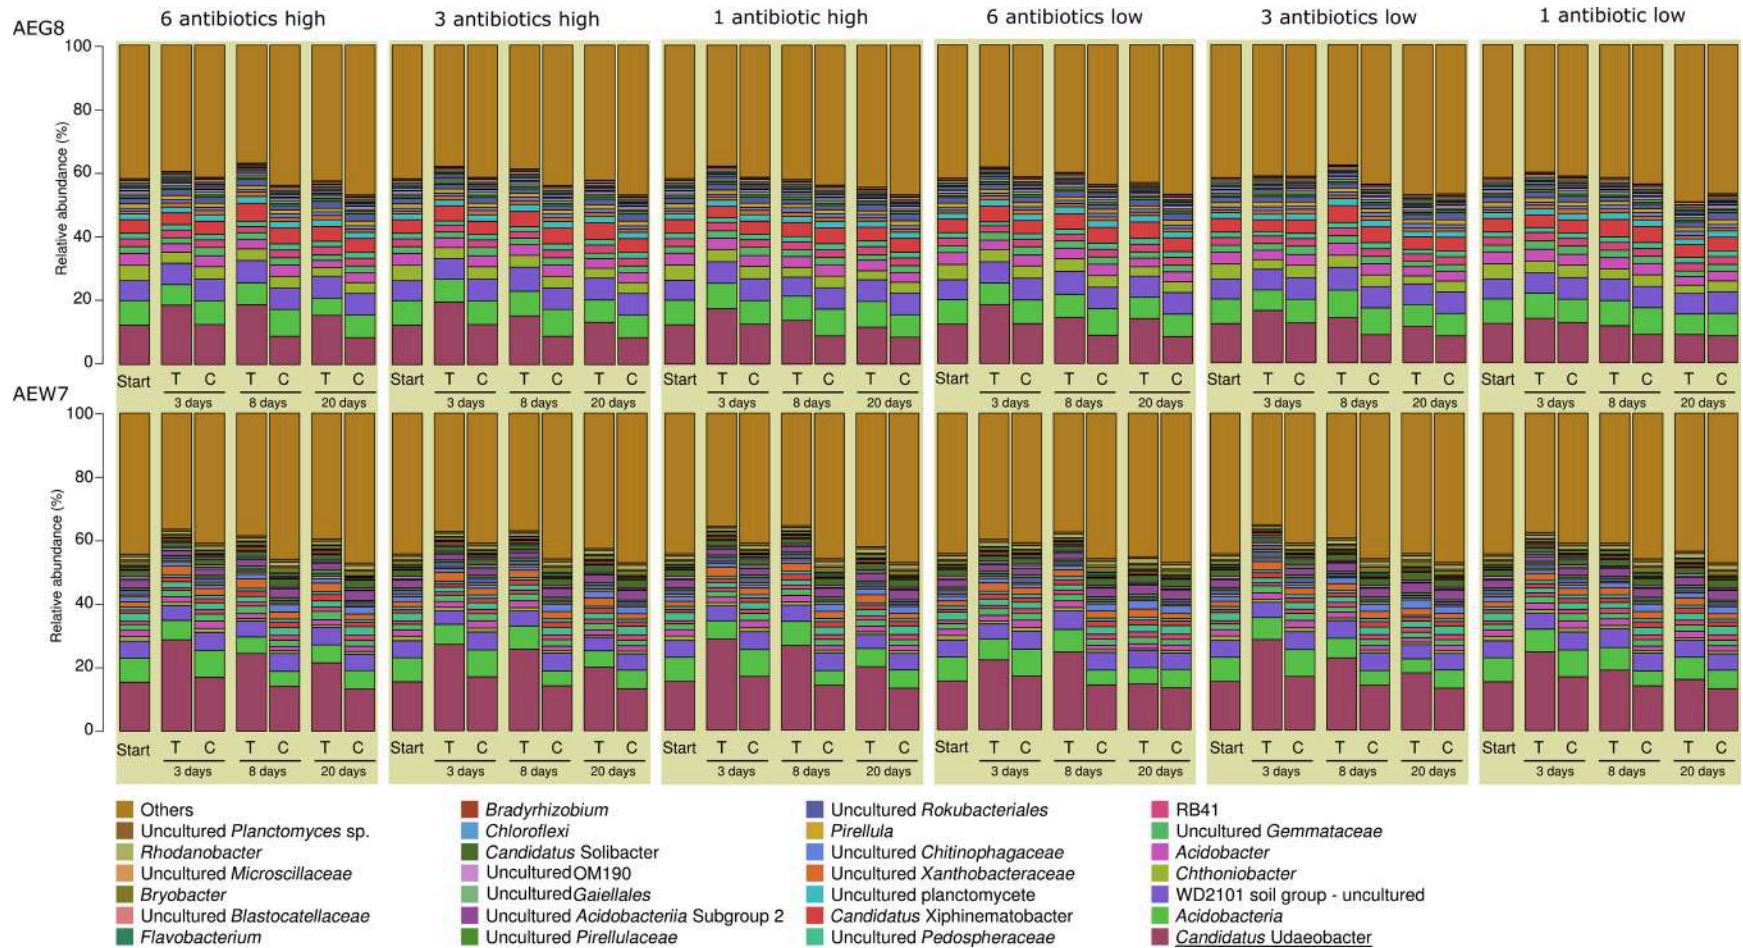

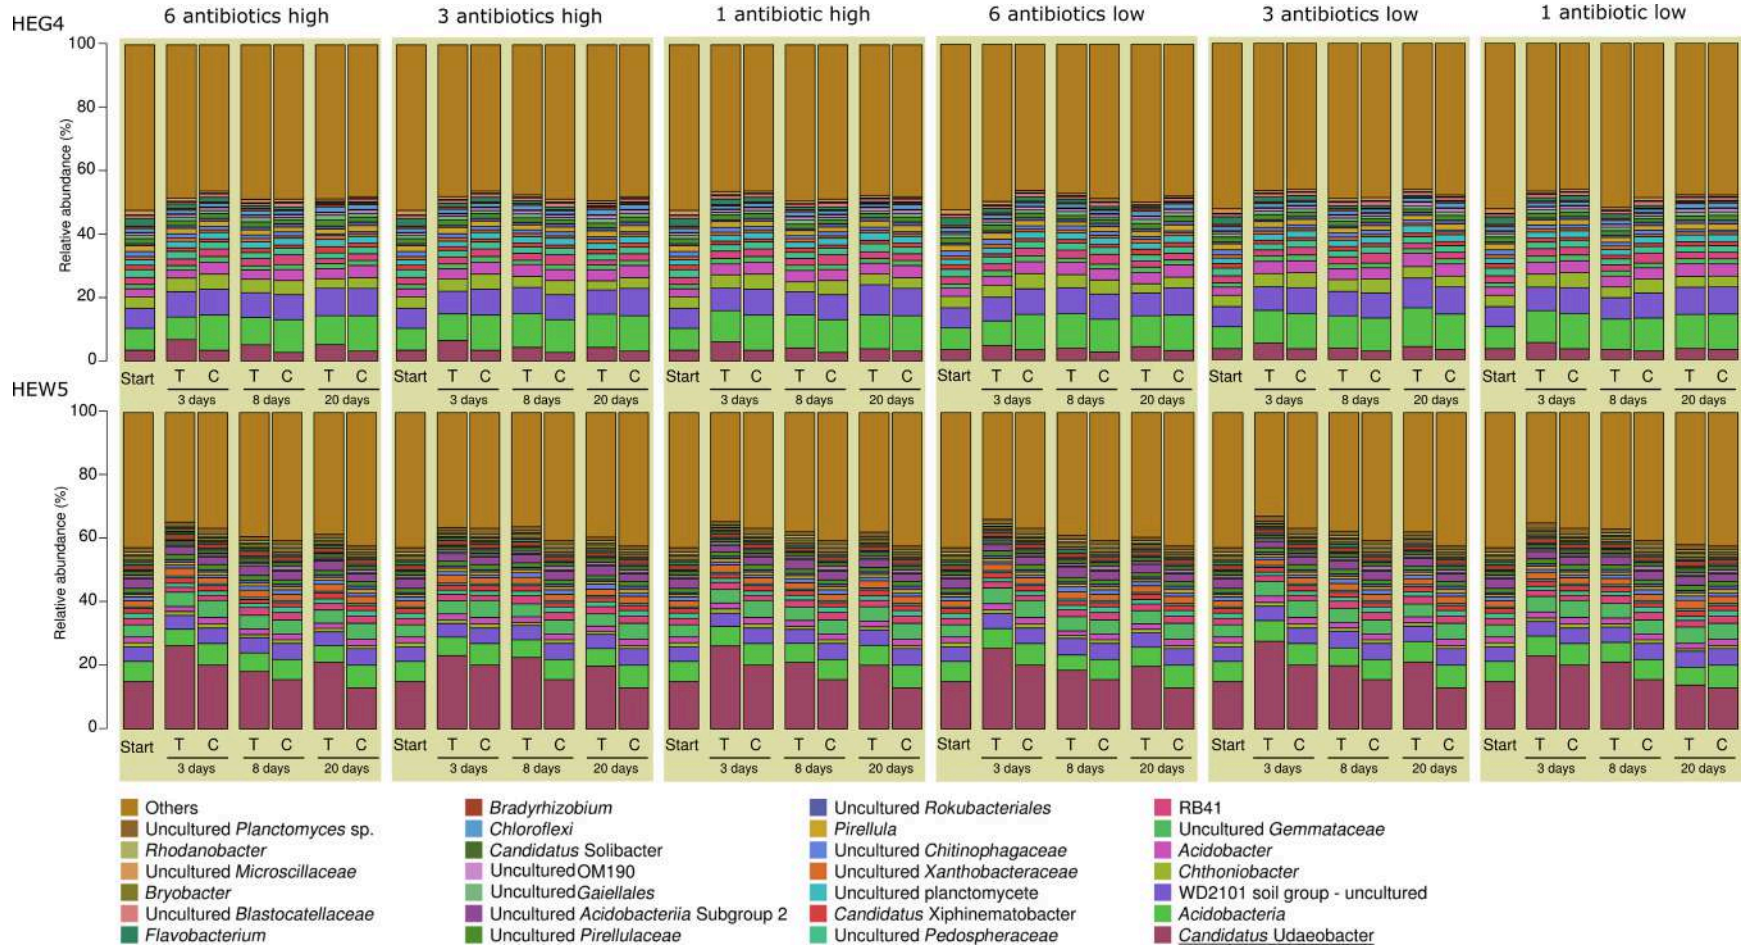



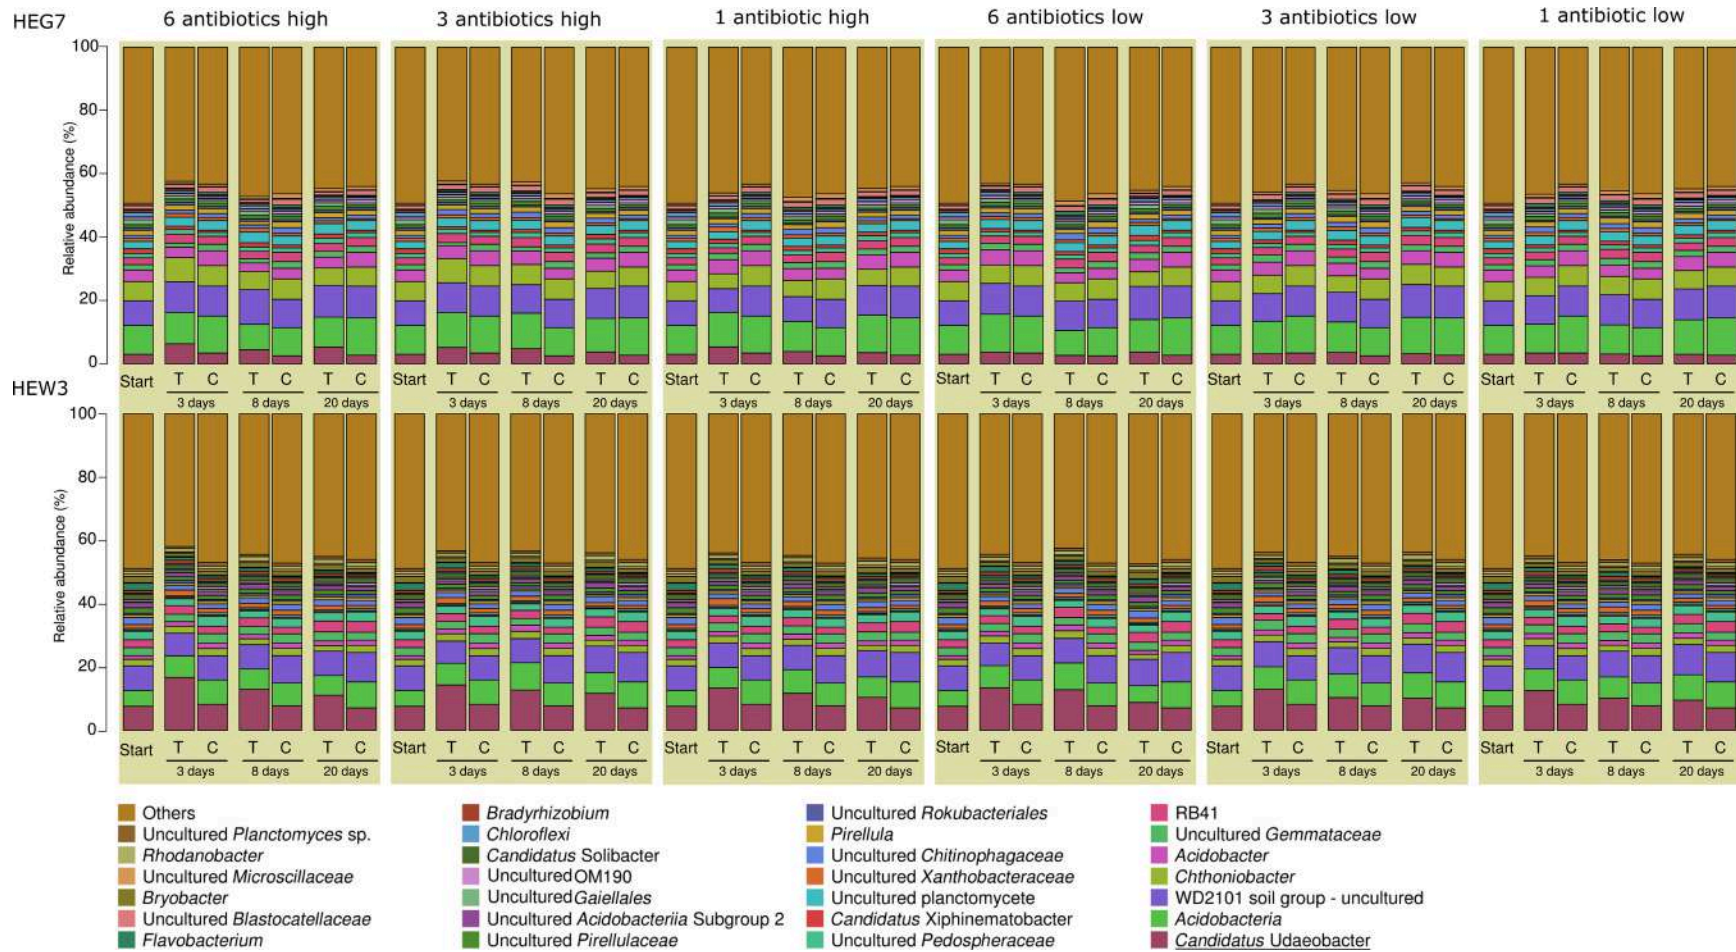

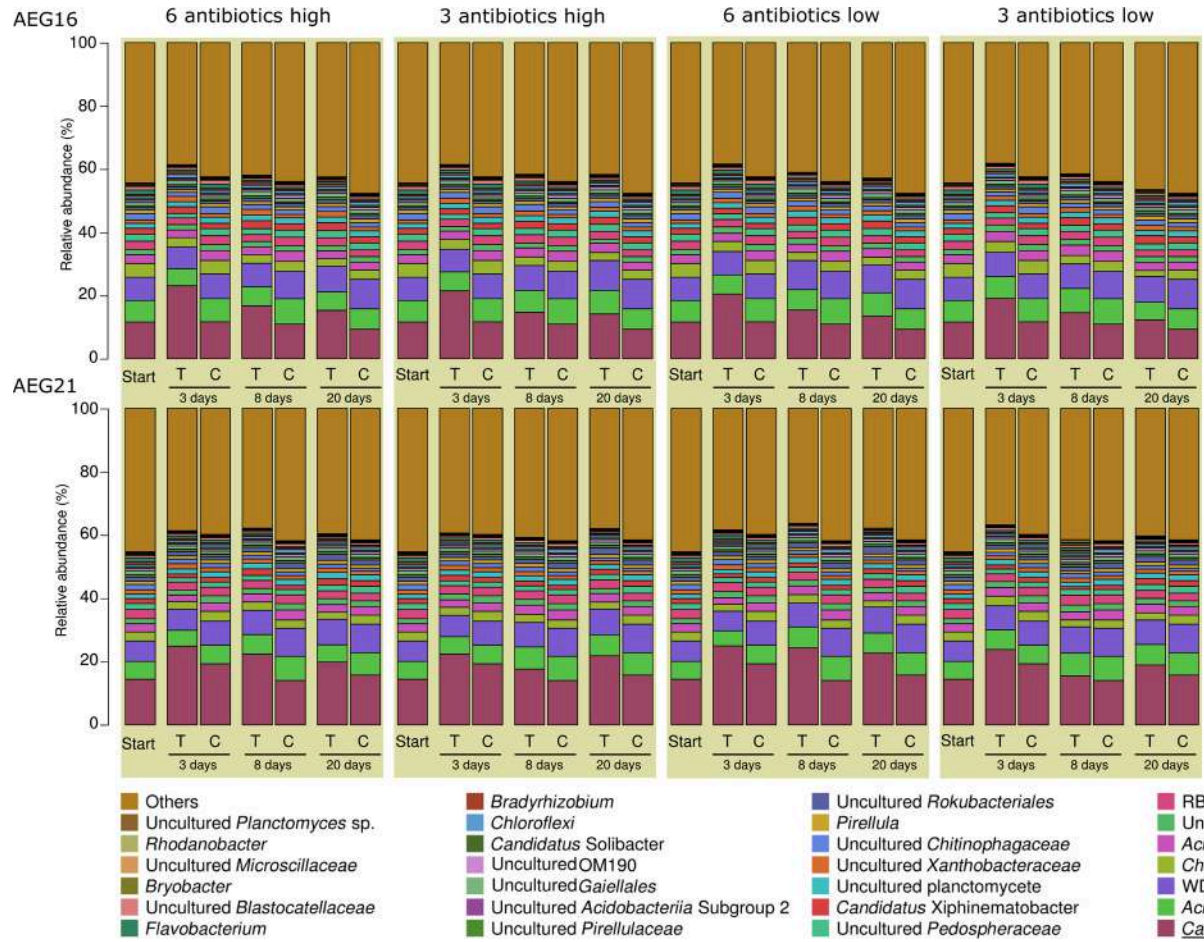

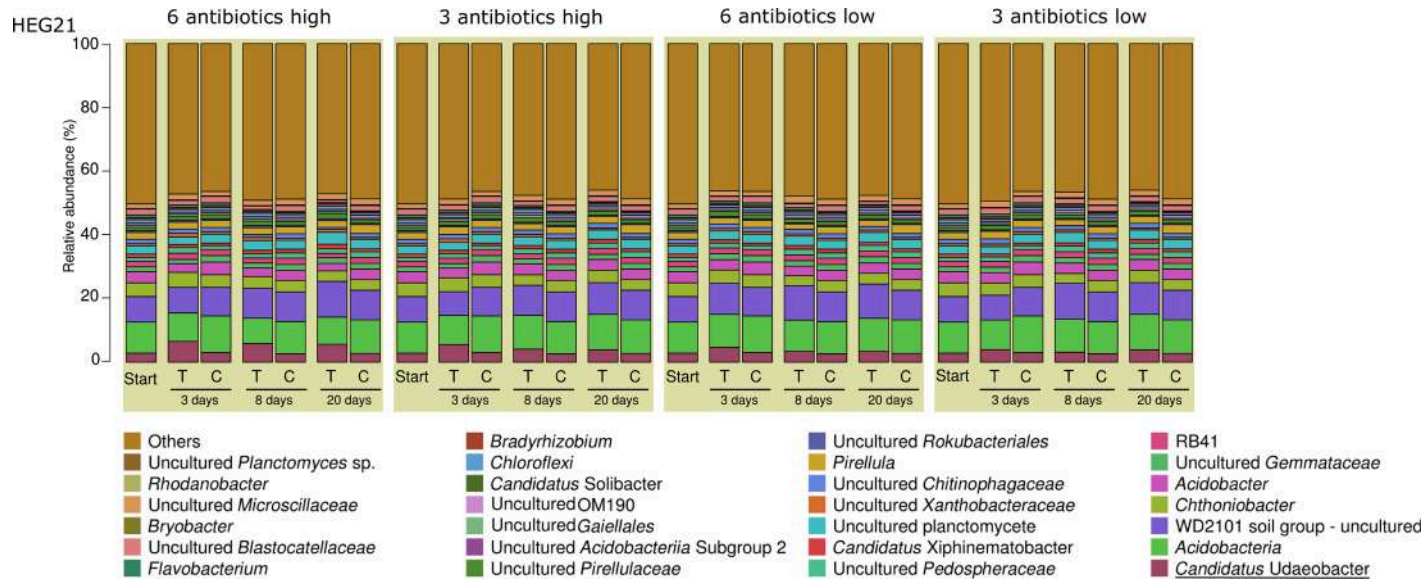

Supplement: mSphere.00186-20-sf001.pdf [file mSphere.00186-20-sf001.pdf]
