# Supplementary material for: Globally Abundant “Candidatus Udaeobacter” Benefits from Release of Antibiotics in Soil and Potentially Performs Trace Gas Scavenging
Source: PubMed Central journal article supplement (PMC7343977; doi:10.1128/msphere.00186-20), 2020-07-08
Supplement: mSphere.00186-20-st001.pdf [file mSphere.00186-20-st001.pdf]

| <b>Plot ID</b> | <b>Exploratory</b> | <b>Plot characteristics</b> | <b>LUI/SMI</b> | <b>pH</b> | <b>% water</b> | <b>C:N ratio</b> |
|----------------|--------------------|-----------------------------|----------------|-----------|----------------|------------------|
| HEG4           | HAI                | Mown, fertilized meadow     | 2.1            | 6.5       | 35.8           | 10.7             |
| HEG7           | HAI                | Pasture                     | 1.7            | 7         | 25.2           | 9.5              |
| HEG21          | HAI                | Mown pasture                | 0.7            | 7.3       | 26.5           | 10.4             |
| HEW3           | HAI                | Spruce forest               | 0.5            | 5.1       | 39.8           | 16.5             |
| HEW5           | HAI                | Beech forest                | 0.2            | 5.3       | 52.5           | 13.1             |
| AEG2           | ALB                | Mown, fertilized meadow     | 3.1            | 6.9       | 59.7           | 9.5              |
| AEG8           | ALB                | Mown pasture                | 1.3            | 6.6       | 70.4           | 10.9             |
| AEG16          | ALB                | Mown, fertilized pasture    | 1.7            | 6.0       | 54.7           | 10.2             |
| AEG21          | ALB                | Mown, fertilized pasture    | 3.9            | 5.8       | 52.9           | 10.0             |
| AEW2           | ALB                | Spruce forest               | 0.6            | 4.8       | 38.3           | 13.9             |
| AEW7           | ALB                | Beech forest                | 0.2            | 5.0       | 64.9           | 12.9             |
| AEW3           | ALB                | Spruce forest               | 0.5            | 5.6       | 52.7           | 13.6             |
