# Supplementary material for: Globally Abundant “Candidatus Udaeobacter” Benefits from Release of Antibiotics in Soil and Potentially Performs Trace Gas Scavenging
Source: PubMed Central journal article supplement (PMC7343977; doi:10.1128/msphere.00186-20), 2020-07-08
Supplement: mSphere.00186-20-st002.pdf [file mSphere.00186-20-st002.pdf]

| Tested antibiotics     | Detection limit (mg/kg soil) | Soil sample (concentration of antibiotic) |
|------------------------|------------------------------|-------------------------------------------|
| <b>Sulfonamides</b>    |                              |                                           |
| Acetylsulfadiazine     | <0.001                       | -                                         |
| Acetylsulfadimethoxine | <0.001                       | -                                         |
| Acetylsulfamethazine   | <0.001                       | -                                         |
| Acetylsulfadoxine      | <0.001                       | -                                         |
| Acetylsulfamerazine    | <0.001                       | -                                         |
| Acetylsulfamethoxazole | <0.001                       | -                                         |
| Acetylsulfathiazole    | <0.001                       | -                                         |
| Sulfadiazine           | <0.001                       | -                                         |
| Sulfadimethoxine       | <0.001                       | -                                         |
| Sulfamethazine         | <0.001                       | -                                         |
| Sulfadoxine            | <0.001                       | -                                         |
| Sulfamerazine          | <0.001                       | -                                         |
| Sulfamethoxazole       | <0.001                       | -                                         |
| Sulfathiazole          | <0.001                       | -                                         |
| <b>Penicillins</b>     |                              |                                           |
| Amoxicillin            | <0.01                        | -                                         |
| Ampicillin             | <0.01                        | -                                         |
| Benzympenicillin       | <0.01                        | -                                         |
| Cloxacillin            | <0.01                        | -                                         |
| Dicloxacillin          | <0.01                        | -                                         |
| Oxacillin              | <0.01                        | -                                         |
| Penethamate            | <0.01                        | -                                         |
| Penicillin V           | <0.01                        | -                                         |
| <b>Aminoglycosides</b> |                              |                                           |
| Apramycin              | <0.01                        | -                                         |
| Clindamycin            | <0.01                        | -                                         |
| Gentamycin C1a         | <0.05                        | -                                         |
| Lincomycin             | <0.01                        | -                                         |
| Neomycin               | <0.01                        | -                                         |
| Spectinomycin          | <0.05                        | -                                         |
| Streptomycin           | <0.01                        | -                                         |
| <b>Polypeptides</b>    |                              |                                           |
| Bacitracin A           | <0.01                        | -                                         |
| Collistin              | <0.03                        | -                                         |
| Nafcillin              | <0.01                        | -                                         |
| Nisin                  | <0.01                        | -                                         |
| <b>Cephalosporins</b>  |                              |                                           |
| Cefadroxil             | <0.01                        | -                                         |
| Cefapirin              | <0.01                        | -                                         |
| Cefazolin              | <0.01                        | -                                         |
| Cefquinome             | <0.01                        | -                                         |
| Ceftiofur              | <0.01                        | -                                         |
| Cefuroxime             | <0.01                        | -                                         |
| Cephalexin             | <0.01                        | -                                         |
| <b>Amphenicols</b>     |                              |                                           |
| Chloramphenicol        | <0.001                       | -                                         |
| Thiamphenicol          | <0.001                       | -                                         |
| <b>Tetracyclines</b>   |                              |                                           |
| Florfenicol            | <0.001                       | -                                         |

| <b>Tested antibiotics</b>     | <b>Detection limit (mg/kg soil)</b> | <b>Soil sample (concentration of antibiotic)</b> |
|-------------------------------|-------------------------------------|--------------------------------------------------|
| Chlortetracycline             | <0.01                               | AEW2 (0.011 mg/kg)                               |
| Demeclocycline                | <0.003                              | -                                                |
| Doxycycline                   | <0.01                               | -                                                |
| Iso-Chlortetracycline         | <0.01                               | -                                                |
| Meclocycline                  | <0.01                               | -                                                |
| Metacycline                   | <0.01                               | -                                                |
| Oxytetracycline               | <0.01                               | -                                                |
| Tetracycline                  | <0.01                               | -                                                |
| <b>Quinolones</b>             |                                     |                                                  |
| Ciprofloxacin                 | <0.001                              | -                                                |
| Danofloxacin                  | <0.01                               | -                                                |
| Difloxacin                    | <0.01                               | -                                                |
| Enrofloxacin                  | <0.01                               | -                                                |
| Marbofloxacin                 | <0.01                               | -                                                |
| Ofloxacin                     | <0.01                               | -                                                |
| Sarafloxacin                  | <0.01                               | -                                                |
| <b>Macrolides</b>             |                                     |                                                  |
| Clarithromycin                | <0.01                               | -                                                |
| Erythromycin                  | <0.01                               | -                                                |
| Flavomycin                    | <0.01                               | -                                                |
| Ivermectin B1a                | <0.05                               | -                                                |
| Natamycin                     | <0.01                               | -                                                |
| Oleandomycin                  | <0.01                               | -                                                |
| Spiramycin S-I                | <0.05                               | -                                                |
| Spiramycin S-II               | <0.01                               | -                                                |
| Spiramycin S-III              | <0.01                               | -                                                |
| Tilmicosin                    | <0.01                               | -                                                |
| Tylosin                       | <0.05                               | -                                                |
| <b>Nitroimidazoles</b>        |                                     |                                                  |
| Metronidazole                 | <0.01                               | -                                                |
| Ronidazole                    | <0.01                               | -                                                |
| <b>Additional antibiotics</b> |                                     |                                                  |
| Imipenem                      | <0.01                               | -                                                |
| Tiamulin                      | <0.001                              | -                                                |
| Trimethoprim                  | <0.01                               | -                                                |
| Tylvalosin                    | <0.01                               | -                                                |
| Valnemulin                    | <0.01                               | -                                                |
| Virginamycin                  | <0.01                               | -                                                |
