# Supplementary material for: Globally Abundant “Candidatus Udaeobacter” Benefits from Release of Antibiotics in Soil and Potentially Performs Trace Gas Scavenging
Source: PubMed Central journal article supplement (PMC7343977; doi:10.1128/msphere.00186-20), 2020-07-08
Supplement: mSphere.00186-20-st003.pdf [file mSphere.00186-20-st003.pdf]

| <b>Model formula</b>                                                   | <b>N</b> | <b>R<sup>2</sup>m/ R<sup>2</sup>c</b> | <b>p<br/>treat.</b>   | <b>Df<br/>treat.</b> | <b>Est.<br/>treat.</b> | <b>p<br/>day</b>     | <b>Df<br/>day</b> | <b>Est.<br/>day</b> |
|------------------------------------------------------------------------|----------|---------------------------------------|-----------------------|----------------------|------------------------|----------------------|-------------------|---------------------|
| Imer(log(Ca. Udaeobacter)~Concentr+Days+(1 plotID/sampleID))           | 606      | 0.04/ 0.96                            | < 2 e <sup>-16</sup>  | 190                  | 6.0 e <sup>-4</sup>    | < 2 e <sup>-16</sup> | 403               | -0.01               |
| Imer(log(Ca. Udaeobacter)~SixAntib.High+Days+(1 plotID/sampleID))      | 83       | 0.15/ 0.96                            | < 2 e <sup>-16</sup>  | 38                   | 9.8 e <sup>-4</sup>    | 1.8 e <sup>-4</sup>  | 66                | -0.01               |
| Imer(log(Ca. Udaeobacter)~SixAntib.Low+Days+(1 plotID/sampleID))       | 79       | 0.06/ 0.96                            | 1.4 e <sup>-13</sup>  | 66                   | 0.01                   | 6.9 e <sup>-4</sup>  | 66                | -0.01               |
| Imer(log(Ca. Udaeobacter)~ThreeAntib.High+Days+(1 plotID/sampleID))    | 87       | 0.08/ 0.95                            | < 2 e <sup>-16</sup>  | 74                   | 1.4 e <sup>-3</sup>    | 7.4 e <sup>-4</sup>  | 74                | -0.01               |
| Imer(log(Ca. Udaeobacter)~ThreeAntib.Low+Days+(1 plotID/sampleID))     | 88       | 0.04/ 0.96                            | 8.4 e <sup>-14</sup>  | 75                   | 0.01                   | 9.9 e <sup>-4</sup>  | 75                | -0.01               |
| Imer(log(Ca. Udaeobacter)~OneAntib.High+Days+(1 plotID/sampleID))      | 65       | 0.1/ 0.97                             | 1.67 e <sup>-11</sup> | 25                   | 4.5 e <sup>-3</sup>    | 2.5 e <sup>-5</sup>  | 50                | -0.01               |
| Imer(log(Ca. Udaeobacter)~OneAntib.Low+Days+(1 plotID/sampleID))       | 66       | 0.04/ 0.96                            | 4.22 e <sup>-7</sup>  | 53                   | 0.02                   | 3.0 e <sup>-5</sup>  | 52                | -0.01               |
| Imer(ASV 6~Concentr+Days+(1 plotID/sampleID))                          | 606      | 0.02/0.90                             | 1.68 e <sup>-6</sup>  | 593                  | 0.04                   | < 2 e <sup>-16</sup> | 593               | -1.73               |
| Imer(log(16S rRNA genes per ng DNA after 3 days)~Concentr+(1  plotID)) | 30       | 0.02/ 0.90                            | 1.84 e <sup>-7</sup>  | 23                   | 1.6 e <sup>-3</sup>    | NA.                  | NA                | NA                  |
