# Supplementary material for: Globally Abundant “Candidatus Udaeobacter” Benefits from Release of Antibiotics in Soil and Potentially Performs Trace Gas Scavenging
Source: PubMed Central journal article supplement (PMC7343977; doi:10.1128/msphere.00186-20), 2020-07-08
Supplement: mSphere.00186-20-st004.pdf [file mSphere.00186-20-st004.pdf]

| <b>GBK assembly accession</b> | <b>GTDB Phylogeny starting with the family</b>                          | <b>Compl.</b> | <b>Cont.</b> | <b>Size in Mbp</b> | <b>GC</b>    |
|-------------------------------|-------------------------------------------------------------------------|---------------|--------------|--------------------|--------------|
| GCA_003221405.1               | f__UBA10450;g__AV69;s__AV69 sp003221405                                 | 66.6%         | 2.0%         | 1.94               | 55.4%        |
| GCA_003218375.1               | f__UBA10450;g__AV80;s__AV80 sp003218375                                 | 100.0%        | 2.7%         | 3.96               | 58.8%        |
| GCA_003218735.1               | f__UBA10450;g__AV55;s__AV55 sp003218735                                 | 72.0%         | 2.6%         | 1.49               | 54.5%        |
| GCA_003218615.1               | f__UBA10450;g__AV55;s__AV55 sp003218615                                 | 88.3%         | 0.5%         | 2.29               | 55.3%        |
| GCA_003219225.1               | f__UBA10450;g__AV17;s__AV17 sp003219225                                 | 70.5%         | 0.7%         | 2.04               | 58.4%        |
| GCA_003219215.1               | f__UBA10450;g__AV40;s__AV40 sp003219215                                 | 90.8%         | 1.7%         | 2.33               | 55.3%        |
| GCA_003219095.1               | f__UBA10450;g__AV69;s__AV69 sp003219095                                 | 71.4%         | 3.2%         | 2.38               | 55.1%        |
| GCA_003244145.1               | f__UBA10450;g__AV80;s__AV80 sp003244145                                 | 92.9%         | 5.1%         | 3.63               | 58.4%        |
| GCF_001613545.1               | f__Terrimicrobiaceae;g__Terrimicrobium;s__Terrimicrobium sacchariphilum | 100.0%        | 2.7%         | 4.75               | 60.2%        |
| GCA_003219465.1               | f__UBA10450;g__AV55;s__AV55 sp003219465                                 | 89.1%         | 6.6%         | 4.19               | 55.2%        |
| GCA_003134785.1               | f__UBA10450;g__AV80;s__AV80 sp003134785                                 | 100.0%        | 3.4%         | 4.39               | 57.8%        |
| GCA_003218885.1               | f__UBA10450;g__AV55;s__AV55 sp003218885                                 | 88.0%         | 2.4%         | 2.30               | 55.4%        |
| GCF_000173075.1               | f__Chthoniobacteraceae;g__Chthoniobacter;s__Chthoniobacter flavus       | 97.3%         | 2.9%         | 7.85               | 61.1%        |
| GCA_003221295.1               | f__UBA10450;g__AV69;s__AV69 sp003221295                                 | 90.2%         | 3.7%         | 2.98               | 55.3%        |
| GCA_003219175.1               | f__UBA10450;g__AV69;s__AV69 sp003219175                                 | 98.0%         | 5.7%         | 3.24               | 55.0%        |
| GCA_003220155.1               | f__UBA10450;g__AV69;s__AV69 sp003220155                                 | 96.3%         | 3.0%         | 3.35               | 55.3%        |
| GCA_003167555.1               | f__UBA10450;g__AV80;s__AV80 sp003167555                                 | 100.0%        | 3.4%         | 4.20               | 58.5%        |
| GCA_003219195.1               | f__UBA10450;g__UBA10450;s__UBA10450 sp003219195                         | 95.3%         | 2.2%         | 2.82               | 55.8%        |
| GCA_003219925.1               | f__UBA10450;g__AV69;s__AV69 sp003219925                                 | 81.2%         | 3.0%         | 2.10               | 55.3%        |
| GCA_003219355.1               | f__UBA10450;g__AV55;s__AV55 sp003219355                                 | 88.4%         | 6.4%         | 2.23               | 54.5%        |
| GCA_003445855.1               | f__UBA10450;g__UBA10450;s__UBA10450 sp003445855                         | 78.0%         | 1.7%         | 2.10               | 55.9%        |
| GCA_003219995.1               | f__UBA10450;g__UBA10450;s__UBA10450 sp003219995                         | 82.6%         | 2.5%         | 2.10               | 55.3%        |
| <b>GCA_003221375.1</b>        | <b>f__UBA10450;g__AV55;s__AV55 sp003221375</b>                          | <b>73.9%</b>  | <b>1.4%</b>  | <b>2.17</b>        | <b>54.1%</b> |
| GCA_003218535.1               | f__UBA10450;g__AV55;s__AV55 sp003218535                                 | 92.6%         | 4.4%         | 2.69               | 54.5%        |
| GCA_003167365.1               | f__UBA10450;g__Palsa-1382;s__Palsa-1382 sp003167365                     | 100.0%        | 1.4%         | 3.13               | 55.2%        |
| GCA_003219495.1               | f__UBA10450;g__AV40;s__AV40 sp003219495                                 | 72.9%         | 1.5%         | 2.11               | 56.3%        |
| GCA_003218305.1               | f__UBA10450;g__AV80;s__AV80 sp003218305                                 | 92.9%         | 4.6%         | 3.60               | 59.0%        |
| GCA_003169695.1               | f__UBA10450;g__AV80;s__AV80 sp003169695                                 | 99.7%         | 4.7%         | 4.14               | 57.2%        |
| GCA_001897195.1               | f__Terrimicrobiaceae;g__Terrimicrobium;s__Terrimicrobium sp001897195    | 96.6%         | 3.8%         | 5.06               | 60.8%        |
| GCA_003219125.1               | f__UBA10450;g__AV69;s__AV69 sp003219125                                 | 92.3%         | 4.6%         | 3.20               | 55.0%        |
| GCA_003219435.1               | f__UBA10450;g__AV55;s__AV55 sp003219435                                 | 86.4%         | 2.4%         | 2.73               | 55.2%        |

| GBK assembly accession | GTDB Phylogeny                                                                                            | Compl. | Cont. | Size in Mbp | GC    |
|------------------------|-----------------------------------------------------------------------------------------------------------|--------|-------|-------------|-------|
| GCA_003220055.1        | f__UBA10450;g__AV40;s__AV40 sp003220055                                                                   | 81.8%  | 0.2%  | 2.08        | 55.5% |
| GCA_003219335.1        | f__UBA10450;g__AV55;s__AV55 sp003219335                                                                   | 83.0%  | 4.1%  | 3.71        | 55.0% |
| GCA_002290555.1        | f__ <i>Terrimicrobiaceae</i> ;g__UBA967;s__UBA967 sp002290555                                             | 81.1%  | 0.2%  | 1.82        | 56.6% |
| GCA_003136515.1        | f__UBA6821;g__UBA6821;s__UBA6821 sp003136515                                                              | 85.1%  | 4.1%  | 2.36        | 53.2% |
| GCA_002298145.1        | f__ <i>Chthoniobacteraceae</i> ;g__UBA695;s__UBA695 sp002298145                                           | 92.6%  | 0.7%  | 4.11        | 60.5% |
| GCA_003218415.1        | f__UBA10450;g__AV55;s__AV55 sp003218415                                                                   | 83.7%  | 3.4%  | 2.05        | 55.3% |
| GCA_003219005.1        | f__UBA10450;g__AV55;s__AV55 sp003219005                                                                   | 87.8%  | 1.1%  | 2.69        | 55.2% |
| GCA_003218975.1        | f__UBA10450;g__AV55;s__AV55 sp003218975                                                                   | 98.0%  | 2.9%  | 3.06        | 55.1% |
| GCA_003218785.1        | f__UBA10450;g__AV55;s__AV55 sp003218785                                                                   | 85.6%  | 0.7%  | 2.78        | 54.9% |
| GCA_003218705.1        | f__UBA10450;g__AV40;s__AV40 sp003218705                                                                   | 76.5%  | 0.8%  | 1.70        | 55.4% |
| GCA_003218945.1        | f__UBA10450;g__AV55;s__AV55 sp003218945                                                                   | 87.8%  | 3.1%  | 2.80        | 55.0% |
| GCA_003219265.1        | f__UBA10450;g__AV133;s__AV133 sp003219265                                                                 | 78.4%  | 1.4%  | 2.09        | 56.2% |
| GCA_003218135.1        | f__UBA10450;g__AV55;s__AV55 sp003218135                                                                   | 91.2%  | 3.7%  | 2.75        | 54.9% |
| GCA_003169975.1        | f__UBA10450;g__Palsa-1392;s__Palsa-1392 sp003169975                                                       | 100.0% | 2.7%  | 4.47        | 59.9% |
| GCF_001318295.1        | f__ <i>Xiphinematobacteraceae</i> ;g__ <i>Xiphinematobacter</i> ;s__ <i>Xiphinematobacter</i> sp001318295 | 89.9%  | 0.0%  | 0.92        | 47.7% |
| GCA_003244125.1        | f__UBA10450;g__AV69;s__AV69 sp003244125                                                                   | 66.0%  | 2.3%  | 2.50        | 58.7% |
| GCA_003217965.1        | f__UBA10450;g__AV69;s__AV69 sp003217965                                                                   | 90.3%  | 3.7%  | 2.64        | 55.2% |
| GCA_003218475.1        | f__UBA10450;g__AV55;s__AV55 sp003218475                                                                   | 94.7%  | 3.6%  | 3.16        | 54.8% |
| GCA_003134765.1        | f__UBA10450;g__AV80;s__AV80 sp003134765                                                                   | 96.0%  | 2.7%  | 4.05        | 58.7% |
| GCA_003221195.1        | f__UBA10450;g__AV55;s__AV55 sp003221195                                                                   | 89.6%  | 4.1%  | 3.10        | 54.3% |
| GCA_003218345.1        | f__UBA10450;g__AV55;s__AV55 sp003218345                                                                   | 82.5%  | 3.2%  | 2.39        | 54.5% |
| GCA_003218915.1        | f__UBA10450;g__AV55;s__AV55 sp003218915                                                                   | 88.7%  | 3.3%  | 2.91        | 54.6% |
| GCA_003220075.1        | f__UBA10450;g__AV69;s__AV69 sp003220075                                                                   | 87.4%  | 4.5%  | 2.79        | 55.2% |
| GCA_003176035.1        | f__ <i>Xiphinematobacteraceae</i> ;g__PSRL01;s__PSRL01 sp003176035                                        | 70.4%  | 3.4%  | 1.92        | 48.5% |
| GCF_003054655.1        | f__ <i>Terrimicrobiaceae</i> ;g__ <i>Terrimicrobium</i> ;s__ <i>Terrimicrobium</i> sp003054655            | 100.0% | 2.0%  | 4.75        | 60.7% |
| GCA_003218265.1        | f__UBA10450;g__AV55;s__AV55 sp003218265                                                                   | 66.6%  | 2.2%  | 2.25        | 55.0% |
| GCA_003218815.1        | f__UBA10450;g__AV55;s__AV55 sp003218815                                                                   | 77.1%  | 2.3%  | 1.85        | 54.6% |
| GCA_003218395.1        | f__UBA10450;g__AV55;s__AV55 sp003218395                                                                   | 90.7%  | 4.4%  | 2.95        | 54.9% |
| GCA_003219695.1        | f__UBA10450;g__AV55;s__AV55 sp003219695                                                                   | 92.8%  | 3.4%  | 3.14        | 55.6% |
| GCA_003219115.1        | f__UBA10450;g__AV69;s__AV69 sp003219115                                                                   | 82.4%  | 1.0%  | 2.67        | 55.3% |
| GCA_003219395.1        | f__UBA10450;g__AV55;s__AV55 sp003219395                                                                   | 69.3%  | 2.2%  | 2.82        | 54.5% |
| GCA_003219415.1        | f__UBA10450;g__AV55;s__AV55 sp003219415                                                                   | 97.8%  | 3.2%  | 3.62        | 54.4% |

| GBK assembly accession    | GTDB Phylogeny                                                                                                                                      | Compl. | Cont. | Size in Mbp | GC    |
|---------------------------|-----------------------------------------------------------------------------------------------------------------------------------------------------|--------|-------|-------------|-------|
| GCA_003217875.1           | f__UBA10450;g__AV55;s__AV55 sp003217875                                                                                                             | 86.8%  | 2.1%  | 2.45        | 54.6% |
| GCA_003220005.1           | f__UBA10450;g__AV55;s__AV55 sp003220005                                                                                                             | 82.4%  | 0.7%  | 2.53        | 55.0% |
| GCA_002396485.1           | f__ <i>Terrimicrobiaceae</i> ;g__UBA967;s__UBA967 sp002396485                                                                                       | 98.7%  | 0.0%  | 2.77        | 56.2% |
| GCA_003217835.1           | f__UBA10450;g__AV55;s__AV55 sp003217835                                                                                                             | 74.3%  | 0.7%  | 1.75        | 54.6% |
| GCA_003218525.1           | f__UBA10450;g__AV69;s__AV69 sp003218525                                                                                                             | 78.0%  | 3.5%  | 2.43        | 55.3% |
| GCA_002452515.1           | f__UBA6821;g__UBA6821;s__UBA6821 sp002452515                                                                                                        | 90.2%  | 1.4%  | 2.35        | 54.0% |
| GCA_003219945.1           | f__UBA10450;g__AV55;s__AV55 sp003219945                                                                                                             | 81.5%  | 2.3%  | 2.24        | 54.9% |
| GCA_003218755.1           | f__UBA10450;g__AV55;s__AV55 sp003218755                                                                                                             | 88.5%  | 3.2%  | 2.63        | 54.9% |
| GCA_003217895.1           | f__UBA10450;g__AV55;s__AV55 sp003217895                                                                                                             | 94.3%  | 2.7%  | 2.74        | 55.0% |
| 2651869889 (IMG Taxon ID) | not listed in the GTDB database (ncbi taxonomy: <i>Chthoniobacteraceae</i> ; <i>Candidatus</i> Udaeobacter; <i>Candidatus</i> Udaeobacter copiosus) | 80.0%  | 4.0%  | 2.66        | 54.3% |
