# Supplementary material for: Globally Abundant “Candidatus Udaeobacter” Benefits from Release of Antibiotics in Soil and Potentially Performs Trace Gas Scavenging
Source: PubMed Central journal article supplement (PMC7343977; doi:10.1128/msphere.00186-20), 2020-07-08
Supplement: mSphere.00186-20-st005.pdf [file mSphere.00186-20-st005.pdf]

| Detection strategy | Contig/scaffold | Annotation   | Product                                                                | deepARG predicted resistance |
|--------------------|-----------------|--------------|------------------------------------------------------------------------|------------------------------|
| deepARG            | 1               | rlmN         | Dual-specificity RNA methyltransferase RlmN                            | Phenicol                     |
| Prokka annotation  | 1               | xerC_1       | Tyrosine recombinase XerC                                              |                              |
| Prokka annotation  | 3               | xerC_2       | Tyrosine recombinase XerC                                              |                              |
| deepARG            | 5               | Udaeo2_04600 | multi-drug exprt ATP binding/permease protein                          | Multidrug                    |
| deepARG            | 6               | phoP         | Alkaline phosphatase synthesis transcriptional regulatory protein PhoP | Glycopeptide                 |
| Prokka annotation  | 6               | ybhF_1       | putative multidrug ABC transporter ATP-binding protein YbhF            |                              |
| Prokka annotation  | 6               | ybhR         | putative multidrug ABC transporter permease YbhR                       |                              |
| Prokka annotation  | 7               | Udaeo2_06040 | Beta-lactamase                                                         |                              |
| deepARG            | 8               | mdtA_1       | multidrug resistance protein MdtA                                      | multidrug                    |
| Prokka annotation  | 8               | mdtC_1       | Multidrug resistance protein MdtC                                      |                              |
| Prokka annotation  | 9               | fabI         | Enoyl-[acyl-carrier-protein] reductase [NADH] FabI                     |                              |
| deepARG            | 11              | macA_1       | macrolide export protein                                               | MLS                          |
| Prokka annotation  | 11              | yknY_1       | putative ABC transporter ATP-binding protein YknY                      |                              |
| Prokka annotation  | 11              | macB_1       | Macrolide export ATP-binding/permease protein MacB                     |                              |
| deepARG            | 11              | rsmA         | ribosomal RNA small subunit methyltransferase A                        | Aminoglycoside               |
| deepARG            | 12              | ybhF_2       | multidrug ABC transporter ATP-binding protein                          | Bacitracin                   |
| deepARG            | 14              | czcR         | Transcriptional activator protein                                      | Glycopeptide                 |
| Prokka annotation  | 14              | macA_2       | Macrolide export protein MacA                                          |                              |
| deepARG            | 17              | nreC         | Oxygen regulatory protein NreC                                         | Unclassified                 |
| deepARG            | 19              | kdpD         | sensor protein                                                         | Unclassified                 |
| Prokka annotation  | 21              | mdtA_2       | Multidrug resistance protein MdtA                                      |                              |
| Prokka annotation  | 22              | Udaeo2_12270 | Beta-lactamase superfamily domain protein                              |                              |
| Diamond            | 23              | Udaeo2_12390 | IS5 family transposase IS1355                                          |                              |
| Prokka annotation  | 27              | Udaeo2_13820 | IS110 family transposase ISGme8                                        |                              |
| Prokka annotation  | 28              | mdtA_3       | Multidrug resistance protein MdtA                                      |                              |

| Detection strategy | Contig/scaffold | Annotation   | Product                                                | deepARG predicted resistance |
|--------------------|-----------------|--------------|--------------------------------------------------------|------------------------------|
| deepARG            | 28              | ybaL         | Putative cation/proton antiporter1 YbaL                | Fosmidomycin                 |
| Prokka annotation  | 30              | vanB         | Vancomycin B-type resistance protein VanB              |                              |
| deepARG            | 40              | spoVD        | Stage V sporulation protein D                          | Beta-lactam                  |
| Diamond            | 42              | xerD_1       | Tyrosine recombinase XerD                              |                              |
| deepARG            | 46              | bepE         | Efflux pump membrane transporter                       | Multidrug                    |
| deepARG            | 46              | srpA         | Solvent efflux pump periplasmatic linker SrpA          | Multidrug                    |
| Prokka annotation  | 49              | Udae02_20030 | IS110 family transposase ISGme8                        |                              |
| Diamond            | 49              | Udae02_20040 | IS3 family transposase ISStau1                         |                              |
| Diamond            | 61              | xerD_2       | Tyrosine recombinase XerD                              |                              |
| Prokka annotation  | 64              | Udae02_23300 | Beta-lactamase                                         |                              |
| Prokka annotation  | 69              | macB_2       | Macrolide export ATP-binding/permease protein MacB     |                              |
| Prokka annotation  | 69              | macB_3       | Macrolide export ATP-binding/permease protein MacB     |                              |
| deepARG            | 69              | Udae02_24310 | Putative multidrug export ATP-binding/permease protein | Multidrug                    |
| Prokka annotation  | 74              | mdtA_4       | Multidrug resistance protein MdtA                      |                              |
| Prokka annotation  | 74              | mdtB_1       | Multidrug resistance protein MdtB                      |                              |
| Prokka annotation  | 74              | mdtB_2       | Multidrug resistance protein MdtB                      |                              |
| Prokka annotation  | 74              | mdtC_2       | Multidrug resistance protein MdtC                      |                              |
| Prokka annotation  | 78              | xerC_3       | Tyrosine recombinase XerC                              |                              |
| Prokka annotation  | 80              | xerC_4       | Tyrosine recombinase XerC                              |                              |
| Prokka annotation  | 89              | InrL         | Linearmycin resistance ATP-binding protein             |                              |
| Prokka annotation  | 89              | InrN         | Linearmycin resistance permease protein InrN           |                              |
| deepARG            | 89              | syrM1        | HTH-type transcriptional regulator SyrM 1              |                              |
| deepARG            | 92              | Udae02_28300 | Putative multidrug export ATP-binding/permease protein | Multidrug                    |
| Diamond            | 94              | recA         | Protein RecA                                           |                              |
| deepARG            | 98              | tcrA         | Transcriptional regulatory protein                     | Glycopeptide                 |

| Detection strategy | Contig/scaffold | Annotation   | Product                                                       | deepARG predicted resistance |
|--------------------|-----------------|--------------|---------------------------------------------------------------|------------------------------|
| Prokka annotation  | 99              | Udaeo2_29330 | macB: subunit of efflux pump conferring antibiotic resistance |                              |
| Prokka annotation  | 99              | Udaeo2_29350 | macB-like periplasmic core domain protein                     |                              |
| Prokka annotation  | 99              | yknY_4       | putative ABC transporter ATP-binding protein YknY             |                              |
| Prokka annotation  | 99              | Udaeo2_29370 | HlyD family secretion protein                                 |                              |
| Prokka annotation  | 106             | mdtA_5       | Multidrug resistance protein MdtA                             |                              |
| Prokka annotation  | 106             | mdtC_3       | Multidrug resistance protein MdtC                             |                              |
| Prokka annotation  | 109             | Udaeo2_30640 | Metallo-beta-lactamase superfamily protein                    |                              |
| Prokka annotation  | 110             | macB_4       | Macrolide export ATP-binding/permease protein MacB            |                              |
| Prokka annotation  | 110             | Udaeo2_30740 | MacB-like periplasmic core domain protein                     |                              |
| Prokka annotation  | 110             | Udaeo2_30700 | MacB-like periplasmic core domain protein                     |                              |
| Prokka annotation  | 110             | Udaeo2_30690 | MacB-like periplasmic core domain protein                     |                              |
| Prokka annotation  | 110             | Udaeo2_30660 | macB: subunit of efflux pump conferring antibiotic resistance |                              |
| Prokka annotation  | 110             | Udaeo2_30670 | macB: subunit of efflux pump conferring antibiotic resistance |                              |
| deepARG            | 112             | stp          | Multidrug resistance protein Stp                              | Tetracenomycin_C             |
| deepARG            | 116             | blaP         | Beta-lactamase                                                | Beta-lactam                  |
| deepARG            | 125             | Udaeo2_32650 | Metallo-beta-lactamase superfamily protein                    | Beta-lactam                  |
| Prokka annotation  | 131             | Udaeo2_33250 | Transposase IS116/IS110/IS902 family protein                  |                              |
| Diamond            | 132             | xerC_5       | Tyrosine recombinase XerC                                     |                              |
